# Supplementary material for: Definition of RNA Polymerase II CoTC Terminator Elements in the Human Genome
Source: PubMed Central journal article supplement (PMC3644702; doi:10.1016/j.celrep.2013.03.012), 2013-04-25
Supplement: mmc1.pdf [file mmc1.pdf]

**Table S1. RNA Linker and DNA Primer List**

| <b>Primer</b>   | <b>Sequence 5'-3'</b>                                         | <b>information</b>                                           |
|-----------------|---------------------------------------------------------------|--------------------------------------------------------------|
| <b>CLIP-seq</b> |                                                               |                                                              |
| RL5             | 5'-OH AGG GAG GAC GAU GCG G 3'-OH                             | 5' RNA linker (GA IIX), made by Thermo                       |
| RL3             | 5'-P GUG UCA GUC ACU UCC AGC GG 3'-puromycin                  | 3' RNA linker (GA IIX), made by Thermo                       |
| DP5             | AGGGAGGACGATGCGG                                              | 5' PCR primer (GA IIX)                                       |
| DP3             | CCGCTGGAAGTGACTGACAC                                          | 3' PCR primer (GA IIX)                                       |
| RL5_solexa1     | 5'-N6 ACACGACGCUCUCCGAUCUrNrNrNAA -3'OH                       | 5' RNA linker with barcode NNNAA (Hiseq2000), made by Thermo |
| RL5_solexa2     | 5'-N6 ACACGACGCUCUCCGAUCUrNrNrNCC -3'OH                       | 5' RNA linker barcode NNNCC (Hiseq2000), made by Thermo      |
| RL3_solexa      | 5'-p AGAUCGGAAGAGCGGUUCAG -3'Puromycin                        | 3' RNA linker(Hiseq2000), made by Thermo                     |
| P5solexa        | AATGATACGGCGACCACCGAGATCTACACTCTTTCCCTACACGACGCTCTTCCGATCT    | 5' PCR primer(Hiseq2000)                                     |
| P3solexa        | CAAGCAGAAGACGGCATACGAGATCGGTCTCGGCATTCCTGCTGAACCGCTCTTCCGATCT | 3' PCR primer(Hiseq2000)                                     |
|                 |                                                               |                                                              |
| <b>PCR</b>      |                                                               |                                                              |
| β5' pA          | GGGATATTATGAAGGCCTTGAGC                                       |                                                              |
| β3' pA          | GAAC TAGCTCTTCATTCTTTATG                                      |                                                              |
| 7SK_FW          | GACATCTGTCAACCCATTGA                                          |                                                              |
| 7SK_RV          | GCCTCATTGGATGTGTCTG                                           |                                                              |
| CCNB1_F1        | AGCTAGTATCTTCAAACCTTC                                         |                                                              |
| CCNB1_R1        | CCATAATTGATGTCCTTCAGG                                         |                                                              |
| AKIRIN1_F1      | TGTCTTTGACTTAAATCTAAC                                         |                                                              |
| AKIRIN1_R1      | AATGGTTATAGCAGCTCTCAC                                         |                                                              |
| PTCH2_F1        | TTACTAAAGATTTCCGTGGAG                                         |                                                              |
| PTCH2_R1        | AACCTCCGTCTTCTAGAGTCA                                         |                                                              |
| THOC2_F1        | AGCATTGTCTTATGAAATGCT                                         |                                                              |
| THOC2_R1        | AGTTCAGCAATACAAGCTCC                                          |                                                              |
| WDR13_F1        | ATGTCAGCTTCAACTGCGACG                                         |                                                              |
| WDR13_R1        | TTCCACCGTGTTCCTGGAGCT                                         |                                                              |
| GAPDH_F1        | CGCACCTTGTTCATGTACCATC                                        |                                                              |
| GAPDH_R1        | TTCTGTAGCACTCAAGACGT                                          |                                                              |
| PKM2_F1         | TTGCTATAGACCTACCTGTA                                          |                                                              |
| PKM2_R1         | ACCAGGAGGTGGGCAGGATGG                                         |                                                              |
| ENO1_F1         | ACTTCCACCAAGTGTCTAGA                                          |                                                              |
| ENO1_R1         | CAATGGATCCTCATCCTTTTC                                         |                                                              |
| BF              | CCTTGGGAAAATACACTATATC                                        |                                                              |
| BR              | CTTGAATCCTTTTCTGAGGGATG                                       |                                                              |
| BETAtermF       | CATCCCTCAGAAAAGGATTCAAG                                       |                                                              |
| BETAtermR       | GAAACCATACCTCTACTGTCT                                         |                                                              |
| BR2             | GATGCGTAAGGAGAAAATACC                                         |                                                              |
| CCNB1_F2        | GTCCATAAGATTATGATGCC                                          |                                                              |
| CCNB1_F3        | GTCTTGAACACCCGACCTCAG                                         |                                                              |
| CCNB1_F4        | GCTTGTCCAACCTGAAATATC                                         |                                                              |
| CCNB1_F5        | CTCACTATGTTGTCCAAGCTG                                         |                                                              |
| CCNB1_R2        | TACTCACACAAATCTAGATGG                                         |                                                              |
| CCNB1_R3        | TATGTCATCTGGTTCTATCAA                                         |                                                              |
| CCNB1_R4        | GTGTTCAGTAGTACTCCATA                                          |                                                              |
| CCNB1_R5        | AACTGATGTCAACTGGATAAG                                         |                                                              |
| CCNB1_R2.1      | GAGTGAGACTTTGTCTCAA                                           |                                                              |

| <b>Primer</b>  | <b>Sequence 5'-3'</b>      | <b>information</b>          |
|----------------|----------------------------|-----------------------------|
| WDR13_F2       | ACAAGCATTGATTGAATGTCT      |                             |
| WDR13_F3       | CATGTTGCTCAGGCTGGTCTT      |                             |
| WDR13_F4       | ATGATCTGACTTGGTCATAGA      |                             |
| WDR13_F5       | TGTCAAAGTTACCTGAAGCAG      |                             |
| WDR13_R2       | CAGTGCCTAGAACAGTTCCTG      |                             |
| WDR13_R3       | ACTCACTTCATTCAAGTCTTT      |                             |
| WDR13_R4       | CCTGCAGCCTAACATAGTGAA      |                             |
| WDR13_R5       | GTTCAAGCAGCTCAGCAATGCT     |                             |
| THOC2_R2       | TAAGCACTCAACAGTCACTGA      |                             |
| THOC2_R3       | CACAAATATTTACTATCTGGC      |                             |
| THOC2_R4       | TGACTAGAAATGGAAGTTCCAT     |                             |
| THOC2_R5       | TCAGAGTTAGTTATAAAGGTC      |                             |
| PTCH2_R2       | CAAACCGCTAACAGCTACTGT      |                             |
| PTCH2_R3       | GCCTGTAATCCCAGATGCTGA      |                             |
| PTCH2_R4       | AGTTAGGGGCTATTGCAATTA      |                             |
| PTCH2_R5       | CTGGGAGTTTGATACCAGTTC      |                             |
| AKIRIN1_R2     | CTGCCTTAGAGCTCTGATCT       |                             |
| AKIRIN1_R3     | AGCAAGTTTAGTAATCTGGCA      |                             |
| AKIRIN1_R4     | TCTCCAGGTCTGACGAAGACT      |                             |
| AKIRIN1_R5     | CTACTCAAGTCTGGAGTTAGT      |                             |
|                |                            |                             |
| <b>Cloning</b> |                            |                             |
| BETA43         | CTTGAATCCTTTTCTGAGGGATG    |                             |
| BETA10.3       | CAGACAGTAGAGGTATGGTTCCAGGG |                             |
| CCNB1termF     | CCATCTAGATTTGTGTGAGTA      | For PCTE with<br>CCNB1_R4   |
| AKIRIN1termF   | AGATCAGAGTCCTAAGGCAG       | For PCTE with<br>AKIRIN1_R4 |
| PTCH2termF     | ACAGTAGCTGTTAGCGGTTTG      | For PCTE with<br>PTCH2_R4   |
| THOC2termF     | GCCTGCAGGCCATGTAGTTC       | For PCTE with<br>THOC2_R5   |
| WDR13termF     | GGAGCTGCTAAGACTTAGGGA      | For PCTE with<br>WDR13_R4   |
